# Supplementary material for: BAL Proteomic Signature of Lung Adenocarcinoma in IPF Patients and Its Transposition in Serum Samples for Less Invasive Diagnostic Procedures
Source: MDPI journal article supplement (doi:10.3390/ijms24020925), 2023-01-04
Supplement: s1 [file s1]

PROCESS NETWORK

| #  | Networks                                                | Total | min(pValue) | Min FDR  | LC-IPF   |          |         |                                                     | IPF      |          |         |                                                |
|----|---------------------------------------------------------|-------|-------------|----------|----------|----------|---------|-----------------------------------------------------|----------|----------|---------|------------------------------------------------|
|    |                                                         |       |             |          | p-value  | FDR      | In Data | Network Objects from Active Data                    | p-value  | FDR      | In Data | Network Objects from Active Data               |
| 1  | Inflammation_IL-6 signaling                             | 119   | 1,98E-05    | 0,000534 | 1,98E-05 | 0,000534 | 5       | HP/HB complex, HDL proteins, HP, Alpha1-globin, HBB | 0,000293 | 0,007039 | 4       | HP/HB complex, HDL proteins, HP, Alpha1-globin |
| 2  | Immune response_BCR pathway                             | 137   | 0,007211    | 0,097351 | 0,007211 | 0,097351 | 3       | Profilin, Kappa chain (Ig light chain), IGHG1       | 0,055808 | 0,299789 | 2       | Kappa chain (Ig light chain), IGHG1            |
| 3  | Inflammation_Complement system                          | 75    | 0,018436    | 0,119946 | 0,020239 | 0,119946 | 2       | Factor Bb, Factor B                                 | 0,018436 | 0,221233 | 2       | Factor Bb, Factor B                            |
| 4  | Cell adhesion_Integrin-mediated cell-matrix adhesion    | 214   | 0,023946    | 0,119946 | 0,023946 | 0,119946 | 3       | RhoGDI alpha, Profilin, Profilin I                  | 0,457617 | 0,492118 | 1       | RhoGDI alpha                                   |
| 5  | Immune response_Phagocytosis                            | 223   | 0,026655    | 0,119946 | 0,026655 | 0,119946 | 3       | Profilin, Profilin I, HDL proteins                  | 0,471613 | 0,492118 | 1       | HDL proteins                                   |
| 6  | Immune response_Phagosome in antigen presentation       | 241   | 0,032552    | 0,125559 | 0,032552 | 0,125559 | 3       | Beta-2-microglobulin, Profilin, Profilin I          | 0,498583 | 0,498583 | 1       | Beta-2-microglobulin                           |
| 7  | Development_Hemopoiesis, Erythropoietin pathway         | 136   | 0,060139    | 0,200377 | 0,060139 | 0,200377 | 2       | Alpha1-globin, HBB                                  | 0,320653 | 0,491672 | 1       | Alpha1-globin                                  |
| 8  | Development_Ossification and bone remodeling            | 157   | 0,070964    | 0,200377 | 0,077331 | 0,200377 | 2       | PRDX1, Fetuin-A                                     | 0,070964 | 0,299789 | 2       | PRDX1, Fetuin-A                                |
| 9  | Response to hypoxia and oxidative stress                | 161   | 0,074145    | 0,200377 | 0,080768 | 0,200377 | 2       | Peroxiredoxin, PRDX1                                | 0,074145 | 0,299789 | 2       | Peroxiredoxin, PRDX1                           |
| 10 | Cell adhesion_Glycoconjugates                           | 162   | 0,074947    | 0,200377 | 0,081635 | 0,200377 | 2       | RhoGDI alpha, HP                                    | 0,074947 | 0,299789 | 2       | RhoGDI alpha, HP                               |
| 11 | Inflammation_Histamine signaling                        | 215   | 0,121133    | 0,253284 | 0,131333 | 0,253284 | 2       | Kappa chain (Ig light chain), IGHG1                 | 0,121133 | 0,403006 | 2       | Kappa chain (Ig light chain), IGHG1            |
| 12 | Development_Neurogenesis_Axonal guidance                | 229   | 0,134335    | 0,261847 | 0,145471 | 0,261847 | 2       | RhoGDI alpha, Calcyclin                             | 0,134335 | 0,403006 | 2       | RhoGDI alpha, Calcyclin                        |
| 13 | Immune response_Th17-derived cytokines                  | 98    | 0,242583    | 0,406073 | 0,253048 | 0,406073 | 1       | Calgranulin B                                       | 0,242583 | 0,491672 | 1       | Calgranulin B                                  |
| 14 | Inflammation_IFN-gamma signaling                        | 109   | 0,266018    | 0,406073 | 0,277297 | 0,406073 | 1       | Factor B                                            | 0,266018 | 0,491672 | 1       | Factor B                                       |
| 15 | Inflammation_IL-4 signaling                             | 115   | 0,278508    | 0,406073 | 0,290206 | 0,406073 | 1       | IGHG1                                               | 0,278508 | 0,491672 | 1       | IGHG1                                          |
| 16 | Inflammation_Amphotericin signaling                     | 118   | 0,284677    | 0,406073 | 0,296577 | 0,406073 | 1       | Calgranulin B                                       | 0,284677 | 0,491672 | 1       | Calgranulin B                                  |
| 17 | Inflammation_Inflammasome                               | 120   | 0,288762    | 0,406073 | 0,300795 | 0,406073 | 1       | APOA1                                               | 0,288762 | 0,491672 | 1       | APOA1                                          |
| 18 | Inflammation_MIF signaling                              | 141   | 0,330337    | 0,441834 | 0,343649 | 0,441834 | 1       | PRDX1                                               | 0,330337 | 0,491672 | 1       | PRDX1                                          |
| 19 | Proliferation_Negative regulation of cell proliferation | 183   | 0,406663    | 0,446038 | 0,421971 | 0,446038 | 1       | Calgizzarin                                         | 0,406663 | 0,491672 | 1       | Calgizzarin                                    |
| 20 | Transport_Calcium transport                             | 192   | 0,421906    | 0,446038 | 0,437554 | 0,446038 | 1       | Annexin III                                         | 0,421906 | 0,491672 | 1       | Annexin III                                    |
| 21 | Immune response_Antigen presentation                    | 193   | 0,423577    | 0,446038 | 0,439261 | 0,446038 | 1       | Beta-2-microglobulin                                | 0,423577 | 0,491672 | 1       | Beta-2-microglobulin                           |
| 22 | Cell adhesion_Amyloid proteins                          | 197   | 0,430213    | 0,446038 | 0,446038 | 0,446038 | 1       | RhoGDI alpha                                        | 0,430213 | 0,491672 | 1       | RhoGDI alpha                                   |

**Table S2.** MetaCore Analysis: the comparison of Process Network by gene ontology of the up-regulated protein in LC-IPF (black) and up-regulated proteins in IPF (grey).
