# Supplementary material for: BAL Proteomic Signature of Lung Adenocarcinoma in IPF Patients and Its Transposition in Serum Samples for Less Invasive Diagnostic Procedures
Source: MDPI journal article supplement (doi:10.3390/ijms24020925), 2023-01-04
Supplement: s1 [file s1]

|         |                                                  |             |        | Kruskal-Wallis | mean  |        |       | Ratios       |              |               |          |               |              |
|---------|--------------------------------------------------|-------------|--------|----------------|-------|--------|-------|--------------|--------------|---------------|----------|---------------|--------------|
| Spot n° | Protein name                                     | Entry name  | AC     | p-value        | IPF   | LC-IPF | CTRL  | IPF/ LC-IPF  | LC-IPF/ IPF  | IPF/CTRL      | CTRL/IPF | LC-IPF/ CTRL  | CTRL/ LC-IPF |
| 3       | Immunoglobulin heavy constant alpha 1 Fragment N | IGHA1_HUMAN | P01876 | 0.005          | 0.036 | 0.000  | 0.000 | <b>0.036</b> | <b>0</b>     | <b>0.036</b>  | <b>0</b> | <b>0</b>      | <b>0</b>     |
| 4       |                                                  |             |        | 0.005          | 0.008 | 0.000  | 0.000 | <b>0.008</b> | <b>0</b>     | <b>0.008</b>  | <b>0</b> | <b>0</b>      | <b>0</b>     |
| 5       | Ferritin light chain                             | FRIL_HUMAN  | P02792 | 0.005          | 0.045 | 0.000  | 0.000 | <b>0.045</b> | <b>0</b>     | <b>0.045</b>  | <b>0</b> | <b>0</b>      | <b>0</b>     |
| 6       |                                                  |             |        | 0.005          | 0.016 | 0.000  | 0.000 | <b>0.016</b> | <b>0</b>     | <b>0.016</b>  | <b>0</b> | <b>0</b>      | <b>0</b>     |
| 7       | Hemoglobin subunit alpha                         | HBA_HUMAN   | P69905 | 0.005          | 0.045 | 0.000  | 0.000 | <b>0.045</b> | <b>0</b>     | <b>0.045</b>  | <b>0</b> | <b>0</b>      | <b>0</b>     |
| 8       |                                                  |             |        | 0.005          | 0.029 | 0.000  | 0.000 | <b>0.029</b> | <b>0</b>     | <b>0.029</b>  | <b>0</b> | <b>0</b>      | <b>0</b>     |
| 10      | Retinol-binding protein 4                        | RET4_HUMAN  | P02753 | 0.006          | 0.061 | 0.158  | 0.024 | 0.403        | <b>2.480</b> | <b>2.712</b>  | 0.369    | <b>6.726</b>  | 0.149        |
| 11      |                                                  |             |        | 0.006          | 0.021 | 0.064  | 0.000 | 0.320        | <b>3.121</b> | <b>0.021</b>  | <b>0</b> | <b>0.064</b>  | <b>0</b>     |
| 12      |                                                  |             |        | 0.006          | 0.043 | 0.022  | 0.000 | <b>2.317</b> | 0.432        | <b>0.043</b>  | <b>0</b> | <b>0.022</b>  | <b>0</b>     |
| 13      | Immunoglobulin heavy constant alpha 1 Fragment N | IGHA1_HUMAN | P01876 | 0.006          | 0.027 | 0.000  | 0.000 | <b>0.027</b> | <b>0</b>     | <b>0.027</b>  | <b>0</b> | <b>0</b>      | <b>0</b>     |
| 14      | Haptoglobin                                      | HPT_HUMAN   | P00738 | 0.006          | 0.037 | 0.000  | 0.000 | <b>0.037</b> | <b>0</b>     | <b>0.037</b>  | <b>0</b> | <b>0</b>      | <b>0</b>     |
| 15      | Hemoglobin subunit beta                          | HBB_HUMAN   | P68871 | 0.006          | 0.126 | 0.374  | 0.000 | 0.397        | <b>2.521</b> | <b>0.126</b>  | <b>0</b> | <b>0.374</b>  | <b>0</b>     |
| 16      | Hemoglobin subunit alpha                         | HBA_HUMAN   | P69905 | 0.006          | 0.052 | 0.019  | 0.000 | <b>2.994</b> | 0.334        | <b>0.052</b>  | <b>0</b> | <b>0.019</b>  | <b>0</b>     |
| 17      | Beta-2-microglobulin                             | B2MG_HUMAN  | P61769 | 0.006          | 0.043 | 0.059  | 0.000 | 0.734        | 1.363        | <b>0.043</b>  | <b>0</b> | <b>0.059</b>  | <b>0</b>     |
| 18      |                                                  |             |        | 0.006          | 0.020 | 0.006  | 0.000 | <b>3.390</b> | 0.295        | <b>0.020</b>  | <b>0</b> | <b>0.006</b>  | <b>0</b>     |
| 19      |                                                  |             |        | 0.006          | 0.107 | 0.062  | 0.000 | <b>2.071</b> | 0.483        | <b>0.107</b>  | <b>0</b> | <b>0.062</b>  | <b>0</b>     |
| 22      | Beta-2-microglobulin                             | B2MG_HUMAN  | P61769 | 0.006          | 0.046 | 0.039  | 0.000 | 1.158        | 0.864        | <b>0.046</b>  | <b>0</b> | <b>0.039</b>  | <b>0</b>     |
| 23      |                                                  |             |        | 0.006          | 0.055 | 0.095  | 0.000 | 0.662        | 1.510        | <b>0.055</b>  | <b>0</b> | <b>0.095</b>  | <b>0</b>     |
| 24      |                                                  |             |        | 0.006          | 0.010 | 0.008  | 0.000 | 1.141        | 0.876        | <b>0.010</b>  | <b>0</b> | <b>0.008</b>  | <b>0</b>     |
| 25      |                                                  |             |        | 0.006          | 0.031 | 0.041  | 0.003 | 0.831        | 1.203        | <b>12.745</b> | 0.078    | <b>15.335</b> | 0.065        |
| 26      | Annexin A3                                       | ANXA3_HUMAN | P12429 | 0.006          | 0.029 | 0.023  | 0.000 | 1.457        | 0.686        | <b>0.029</b>  | <b>0</b> | <b>0.023</b>  | <b>0</b>     |
| 27      |                                                  |             |        | 0.006          | 0.041 | 0.043  | 0.000 | 1.119        | 0.893        | <b>0.041</b>  | <b>0</b> | <b>0.043</b>  | <b>0</b>     |
| 28      |                                                  |             |        | 0.006          | 0.077 | 0.069  | 0.000 | 1.110        | 0.901        | <b>0.077</b>  | <b>0</b> | <b>0.069</b>  | <b>0</b>     |
| 29      |                                                  |             |        | 0.006          | 0.058 | 0.073  | 0.000 | 0.928        | 1.077        | <b>0.058</b>  | <b>0</b> | <b>0.073</b>  | <b>0</b>     |
| 30      |                                                  |             |        | 0.006          | 0.096 | 0.105  | 0.000 | 0.915        | 1.092        | <b>0.096</b>  | <b>0</b> | <b>0.105</b>  | <b>0</b>     |
| 31      | Albumin fragment C                               | ALBU_HUMAN  | P02768 | 0.007          | 0.271 | 0.464  | 0.008 | 0.636        | 1.572        | <b>38.409</b> | 0.026    | <b>60.397</b> | 0.017        |
| 32      | Immunoglobulin kappa constant                    | IGKC_HUMAN  | P01834 | 0.007          | 1.063 | 0.892  | 0.224 | 1.163        | 0.860        | <b>4.634</b>  | 0.216    | <b>3.985</b>  | 0.251        |
| 33      | Rho GDP-dissociation inhibitor 1                 | GDIR1_HUMAN | P52565 | 0.007          | 0.074 | 0.076  | 0.016 | 0.778        | 1.285        | <b>3.659</b>  | 0.273    | <b>4.701</b>  | 0.213        |
| 34      | Apolipoprotein A-I                               | APOA1_HUMAN | P02647 | 0.007          | 0.228 | 0.243  | 0.013 | 0.914        | 1.094        | <b>17.465</b> | 0.057    | <b>19.114</b> | 0.052        |

|    |                                                 |             |        |       |       |       |       |       |        |        |       |        |       |
|----|-------------------------------------------------|-------------|--------|-------|-------|-------|-------|-------|--------|--------|-------|--------|-------|
| 35 | Immunoglobulin kappa constant                   | IGKC_HUMAN  | P01834 | 0.007 | 0.795 | 0.392 | 0.073 | 1.868 | 0.535  | 9.977  | 0.100 | 5.342  | 0.187 |
| 36 | Alpha-2-HS-glycoprotein                         | FETUA_HUMAN | P02765 | 0.007 | 0.041 | 0.053 | 0.000 | 0.865 | 1.155  | 0.041  | 0     | 0.053  | 0     |
| 37 | Transthyretin                                   | TTHY_HUMAN  | P02766 | 0.007 | 0.066 | 0.124 | 0.025 | 0.519 | 1.928  | 2.572  | 0.389 | 4.960  | 0.202 |
| 38 | Transthyretin                                   | TTHY_HUMAN  | P02766 | 0.007 | 0.104 | 0.271 | 0.045 | 0.334 | 2.992  | 1.989  | 0.503 | 5.951  | 0.168 |
| 40 | Transthyretin                                   | TTHY_HUMAN  | P02766 | 0.007 | 0.029 | 0.000 | 0.000 | 0.029 | 0      | 0.029  | 0     | 0      | 0     |
| 41 |                                                 |             |        | 0.007 | 0.010 | 0.127 | 0.000 | 0.081 | 12.385 | 0.010  | 0     | 0.127  | 0     |
| 42 | Apolipoprotein A-I                              | APOA1_HUMAN | P02647 | 0.007 | 0.083 | 0.112 | 0.007 | 0.752 | 1.330  | 11.572 | 0.086 | 15.388 | 0.065 |
| 43 | Protein S100-A11                                | S10AB_HUMAN | P31949 | 0.007 | 0.018 | 0.014 | 0.000 | 1.180 | 0.848  | 0.018  | 0     | 0.014  | 0     |
| 46 | Haptoglobin                                     | HPT_HUMAN   | P00738 | 0.007 | 0.060 | 0.049 | 0.000 | 1.018 | 0.983  | 0.060  | 0     | 0.049  | 0     |
| 53 | Peroxiredoxin-1                                 | PRDX1_HUMAN | Q06830 | 0.012 | 0.032 | 0.037 | 0.000 | 0.797 | 1.255  | 0.032  | 0     | 0.037  | 0     |
| 55 | Immunoglobulin heavy constant gamma             | IGHG1_HUMAN | P01857 | 0.012 | 0.088 | 0.196 | 0.013 | 0.486 | 2.057  | 7.222  | 0.138 | 14.854 | 0.067 |
| 57 | Albumin Fragment C                              | ALBU_HUMAN  | P02768 | 0.012 | 0.022 | 0.130 | 0.072 | 0.166 | 6.027  | 0.301  | 3.325 | 1.813  | 0.552 |
| 60 | Immunoglobulin kappa constant                   | IGKC_HUMAN  | P01834 | 0.012 | 0.405 | 0.167 | 0.040 | 2.230 | 0.448  | 9.418  | 0.106 | 4.223  | 0.237 |
| 61 | Immunoglobulin kappa constant                   | IGKC_HUMAN  | P01835 | 0.012 | 0.948 | 0.830 | 0.446 | 1.179 | 0.848  | 2.194  | 0.456 | 1.860  | 0.538 |
| 62 |                                                 |             |        | 0.012 | 0.012 | 0.026 | 0.000 | 0.507 | 1.971  | 0.012  | 0     | 0.026  | 0     |
| 63 | Profilin-1                                      | PROF1_HUMAN | P07737 | 0.013 | 0.007 | 0.022 | 0.000 | 0.139 | 7.188  | 0.007  | 0     | 0.022  | 0     |
| 65 | Cystatin                                        | CYTB_HUMAN  | P04080 | 0.015 | 0.136 | 0.152 | 0.022 | 0.959 | 1.043  | 6.672  | 0.150 | 6.957  | 0.144 |
| 66 |                                                 |             |        | 0.022 | 0.074 | 0.049 | 0.015 | 1.666 | 0.600  | 5.299  | 0.189 | 3.181  | 0.314 |
| 67 | Haptoglobin                                     | HPT_HUMAN   | P00738 | 0.023 | 0.344 | 0.621 | 0.200 | 0.564 | 1.772  | 1.753  | 0.571 | 3.106  | 0.322 |
| 68 | Apolipoprotein A-I                              | APOA1_HUMAN | P02647 | 0.025 | 0.119 | 0.145 | 0.016 | 0.874 | 1.144  | 7.982  | 0.125 | 9.134  | 0.109 |
|    | MIX: Pulmonary surfactant-associated protein A2 | SFPA2_HUMAN | Q8IWL1 |       |       |       |       |       |        |        |       |        |       |
| 69 | Pulmonary surfactant-associated protein A1      | SFTA1_HUMAN | Q8IWL2 | 0.025 | 0.821 | 0.222 | 0.254 | 3.915 | 0.255  | 3.426  | 0.292 | 0.875  | 1.143 |
|    | Transthyretin                                   | TTHY_HUMAN  | P02766 |       |       |       |       |       |        |        |       |        |       |
| 70 |                                                 |             |        | 0.027 | 0.041 | 0.060 | 0.012 | 0.764 | 1.310  | 3.682  | 0.272 | 4.822  | 0.207 |
| 72 | Complement factor B                             | CFAB_HUMAN  | P00751 | 0.032 | 0.050 | 0.052 | 0.013 | 0.865 | 1.157  | 3.509  | 0.285 | 4.059  | 0.246 |
| 73 | Alpha-2-HS-glycoprotein                         | FETUA_HUMAN | P02765 | 0.035 | 0.040 | 0.072 | 0.013 | 0.553 | 1.810  | 3.049  | 0.328 | 5.518  | 0.181 |
| 74 | Calcyphosin                                     | CAYP1_HUMAN | Q13938 | 0.036 | 0.118 | 0.047 | 0.030 | 2.476 | 0.404  | 3.828  | 0.261 | 1.546  | 0.647 |
| 76 | Immunoglobulin kappa constant                   | IGKC_HUMAN  | P01834 | 0.038 | 1.163 | 0.524 | 0.780 | 2.271 | 0.440  | 1.525  | 0.656 | 0.671  | 1.489 |
| 77 | Leukocyte elastase inhibitor                    | ILEU_HUMAN  | P30740 | 0.038 | 0.025 | 0.018 | 0.008 | 1.509 | 0.663  | 3.467  | 0.288 | 2.298  | 0.435 |
| 78 | Serotransferrin                                 | TRFE_HUMAN  | P02787 | 0.040 | 0.562 | 0.656 | 0.939 | 0.771 | 1.297  | 0.539  | 1.856 | 0.699  | 1.431 |
| 82 | Immunoglobulin kappa constant                   | IGKC_HUMAN  | P01834 | 0.043 | 0.709 | 0.269 | 0.237 | 2.917 | 0.343  | 3.314  | 0.302 | 1.136  | 0.880 |
| 84 |                                                 |             |        | 0.045 | 0.021 | 0.011 | 0.006 | 2.089 | 0.479  | 3.922  | 0.255 | 1.877  | 0.533 |

|    |                                     |             |        |       |       |       |       |       |       |       |       |       |       |
|----|-------------------------------------|-------------|--------|-------|-------|-------|-------|-------|-------|-------|-------|-------|-------|
| 86 | Apolipoprotein A-I                  | APOA1_HUMAN | P02647 | 0.046 | 0.137 | 0.103 | 0.045 | 1.372 | 0.729 | 3.152 | 0.317 | 2.298 | 0.435 |
| 87 | Immunoglobulin heavy constant gamma | IGHG1_HUMAN | P01857 | 0.047 | 0.087 | 0.077 | 0.022 | 1.159 | 0.863 | 4.106 | 0.244 | 3.542 | 0.282 |

**Table S1.** Table reporting the statistically relevant spots by spot numbers, protein name, UniProt accession number, Kruskal Wallis p-values, IPF, LC-IPF, CTRL means and ratios. Grey squares highlight qualitative differences and the values refer to the means of %V of the condition in which the relative spot was present.
