# Supplementary material for: BAL Proteomic Signature of Lung Adenocarcinoma in IPF Patients and Its Transposition in Serum Samples for Less Invasive Diagnostic Procedures
Source: MDPI journal article supplement (doi:10.3390/ijms24020925), 2023-01-04
Supplement: s1 [file s1]

Enrichment by Pathway Maps

| #  | Maps                                                                                                                                            | Total | min(pValue) | Min FDR  | LC-IPF   |          |         |                                         | IPF      |          |         |                                         |
|----|-------------------------------------------------------------------------------------------------------------------------------------------------|-------|-------------|----------|----------|----------|---------|-----------------------------------------|----------|----------|---------|-----------------------------------------|
|    |                                                                                                                                                 |       |             |          | p-value  | FDR      | In Data | Network Objects from Active Data        | p-value  | FDR      | In Data | Network Objects from Active Data        |
| 1  | HDL dyslipidemia in type 2 diabetes and metabolic syndrome X                                                                                    | 38    | 6,21E-07    | 4,35E-05 | 8,83E-07 | 5,59E-05 | 4       | HDL, Pre beta-1 HDL, APOA1, Nascent HDL | 6,21E-07 | 4,35E-05 | 4       | HDL, Pre beta-1 HDL, APOA1, Nascent HDL |
| 2  | Transport_HDL-mediated reverse cholesterol transport                                                                                            | 42    | 9,36E-07    | 4,35E-05 | 1,33E-06 | 5,59E-05 | 4       | HDL, Pre beta-1 HDL, APOA1, Nascent HDL | 9,36E-07 | 4,35E-05 | 4       | HDL, Pre beta-1 HDL, APOA1, Nascent HDL |
| 3  | Alternative complement cascade disruption in age-related macular degeneration                                                                   | 31    | 2,38E-05    | 0,000737 | 3,08E-05 | 0,000861 | 3       | Factor Ba, Factor Bb, Factor B          | 2,38E-05 | 0,000737 | 3       | Factor Ba, Factor Bb, Factor B          |
| 4  | Immune response_Alternative complement pathway                                                                                                  | 53    | 0,000121    | 0,002804 | 0,000156 | 0,003269 | 3       | Factor Ba, Factor Bb, Factor B          | 0,000121 | 0,002804 | 3       | Factor Ba, Factor Bb, Factor B          |
| 5  | Lipoprotein metabolism                                                                                                                          | 68    | 0,000253    | 0,004713 | 0,000327 | 0,005485 | 3       | Pre beta-1 HDL, APOA1, Nascent HDL      | 0,000253 | 0,004713 | 3       | Pre beta-1 HDL, APOA1, Nascent HDL      |
| 6  | Retinoic acid regulation of oligodendrocyte differentiation in multiple sclerosis                                                               | 24    | 0,001035    | 0,013481 | 0,001035 | 0,013481 | 2       | RBP4, Transthyretin                     | 0,043342 | 0,137987 | 1       | Transthyretin                           |
| 7  | Fenofibrate in treatment of type 2 diabetes and metabolic syndrome X                                                                            | 25    | 0,001123    | 0,013481 | 0,001123 | 0,013481 | 2       | RBP4, APOA1                             | 0,045108 | 0,137987 | 1       | APOA1                                   |
| 8  | Cholesterol and Sphingolipid transport / Recycling to plasma membrane in lung (normal and CF)                                                   | 29    | 0,00128     | 0,015886 | 0,001513 | 0,015886 | 2       | HDL, APOA1                              | 0,00128  | 0,019833 | 2       | HDL, APOA1                              |
| 9  | Development_FGF and BMP signaling in early embryonic hepatogenesis                                                                              | 31    | 0,001729    | 0,016133 | 0,001729 | 0,016133 | 2       | Transthyretin, Albumin                  | 0,055641 | 0,137987 | 1       | Transthyretin                           |
| 10 | Transcription_Role of the non-genomic action of Retinoic acid and phosphorylation of Retinoic acid receptors in the initiation of transcription | 35    | 0,002201    | 0,018136 | 0,002201 | 0,018136 | 2       | RBP4, Transthyretin                     | 0,0626   | 0,137987 | 1       | Transthyretin                           |
| 11 | Development_Retinoic acid and retinoic acid receptors in regulation of oligodendrocyte differentiation                                          | 37    | 0,002458    | 0,018136 | 0,002458 | 0,018136 | 2       | RBP4, Transthyretin                     | 0,066062 | 0,137987 | 1       | Transthyretin                           |
| 12 | Transcription_Role of AP-1 in regulation of cellular metabolism                                                                                 | 38    | 0,002591    | 0,018136 | 0,002591 | 0,018136 | 2       | Alpha1-globin, HBB                      | 0,067788 | 0,137987 | 1       | Alpha1-globin                           |
| 13 | Niacin-HDL metabolism                                                                                                                           | 46    | 0,0032      | 0,022664 | 0,003777 | 0,022664 | 2       | HDL proteins, APOA1                     | 0,0032   | 0,042521 | 2       | HDL proteins, APOA1                     |
| 14 | Development_EPO-induced PI3K/AKT pathway and Ca(2+) influx                                                                                      | 43    | 0,003308    | 0,021373 | 0,003308 | 0,021373 | 2       | Alpha1-globin, HBB                      | 0,076373 | 0,137987 | 1       | Alpha1-globin                           |

|    |                                                                                                           |    |          |          |          |          |   |                              |          |          |   |                              |
|----|-----------------------------------------------------------------------------------------------------------|----|----------|----------|----------|----------|---|------------------------------|----------|----------|---|------------------------------|
| 15 | Development_Signaling pathways in embryonic hepatocyte maturation                                         | 51 | 0,004625 | 0,025899 | 0,004625 | 0,025899 | 2 | RBP4, APOA1                  | 0,089953 | 0,137987 | 1 | APOA1                        |
| 16 | Transport_Intracellular cholesterol transport                                                             | 83 | 0,010097 | 0,058654 | 0,01187  | 0,058654 | 2 | HDL, APOA1                   | 0,010097 | 0,117377 | 2 | HDL, APOA1                   |
| 17 | Immune response_Sialic-acid receptors (Siglecs) signaling                                                 | 14 | 0,025506 | 0,129242 | 0,027695 | 0,129242 | 1 | HP                           | 0,025506 | 0,137987 | 1 | HP                           |
| 18 | Transition of Smoldering multiple myeloma to active multiple myeloma (schema)                             | 17 | 0,03089  | 0,136222 | 0,033533 | 0,136222 | 1 | Ig light chain               | 0,03089  | 0,137987 | 1 | Ig light chain               |
| 19 | Putative pathways of MHC class I-dependent postsynaptic long-term depression in major depressive disorder | 21 | 0,038024 | 0,136222 | 0,041264 | 0,136222 | 1 | Beta-2-microglobulin         | 0,038024 | 0,137987 | 1 | Beta-2-microglobulin         |
| 20 | Role of ZNF202 in regulation of expression of genes involved in atherosclerosis                           | 21 | 0,038024 | 0,136222 | 0,041264 | 0,136222 | 1 | HDL proteins                 | 0,038024 | 0,137987 | 1 | HDL proteins                 |
| 21 | Multiple sclerosis (general schema)                                                                       | 21 | 0,038024 | 0,136222 | 0,041264 | 0,136222 | 1 | Transthyretin                | 0,038024 | 0,137987 | 1 | Transthyretin                |
| 22 | Transition of Monoclonal gammopathy of undetermined significance to active multiple myeloma (schema)      | 22 | 0,0398   | 0,136222 | 0,043188 | 0,136222 | 1 | Ig light chain               | 0,0398   | 0,137987 | 1 | Ig light chain               |
| 23 | G-protein signaling_CDC42 inhibition                                                                      | 24 | 0,043342 | 0,136222 | 0,047024 | 0,136222 | 1 | RhoGDI alpha                 | 0,043342 | 0,137987 | 1 | RhoGDI alpha                 |
| 24 | Putative pathways of activation of monoclonal protein secretion in multiple myeloma                       | 25 | 0,045108 | 0,136222 | 0,048937 | 0,136222 | 1 | Kappa chain (Ig light chain) | 0,045108 | 0,137987 | 1 | Kappa chain (Ig light chain) |
| 25 | Immune escape mechanisms in Prostate Cancer                                                               | 25 | 0,045108 | 0,136222 | 0,048937 | 0,136222 | 1 | Beta-2-microglobulin         | 0,045108 | 0,137987 | 1 | Beta-2-microglobulin         |
| 26 | Immune response_IFN-gamma actions on blood cells                                                          | 28 | 0,050388 | 0,136222 | 0,054652 | 0,136222 | 1 | Alpha1-globin                | 0,050388 | 0,137987 | 1 | Alpha1-globin                |
| 27 | Development_Role of CNTF and LIF in regulation of oligodendrocyte development                             | 28 | 0,050388 | 0,136222 | 0,054652 | 0,136222 | 1 | RhoGDI alpha                 | 0,050388 | 0,137987 | 1 | RhoGDI alpha                 |
| 28 | Cigarette smoke-mediated regulation of NRF2-antioxidant pathway in airway epithelial cells                | 29 | 0,052142 | 0,136222 | 0,05655  | 0,136222 | 1 | PRDX1                        | 0,052142 | 0,137987 | 1 | PRDX1                        |
| 29 | Role of CNTF and LIF in regulation of oligodendrocyte development in multiple sclerosis                   | 30 | 0,053893 | 0,136222 | 0,058444 | 0,136222 | 1 | RhoGDI alpha                 | 0,053893 | 0,137987 | 1 | RhoGDI alpha                 |
| 30 | Regulation of lipid metabolism_RXR-dependent regulation of lipid metabolism via PPAR, RAR and VDR         | 30 | 0,053893 | 0,136222 | 0,058444 | 0,136222 | 1 | APOA1                        | 0,053893 | 0,137987 | 1 | APOA1                        |

|    |                                                                                                          |    |          |          |          |          |   |                      |          |          |   |                      |
|----|----------------------------------------------------------------------------------------------------------|----|----------|----------|----------|----------|---|----------------------|----------|----------|---|----------------------|
| 31 | G-protein signaling_Rac1 inhibition                                                                      | 31 | 0,055641 | 0,136222 | 0,060335 | 0,136222 | 1 | RhoGDI alpha         | 0,055641 | 0,137987 | 1 | RhoGDI alpha         |
| 32 | Role of IL-6 in obesity and type 2 diabetes in adipocytes                                                | 32 | 0,057385 | 0,136222 | 0,062222 | 0,136222 | 1 | HP                   | 0,057385 | 0,137987 | 1 | HP                   |
| 33 | Microsatellite instability in colorectal cancer                                                          | 34 | 0,060865 | 0,136222 | 0,065984 | 0,136222 | 1 | Beta-2-microglobulin | 0,060865 | 0,137987 | 1 | Beta-2-microglobulin |
| 34 | Role of growth factor receptors transactivation by Hyaluronic acid / CD44 signaling in tumor progression | 35 | 0,0626   | 0,136222 | 0,06786  | 0,136222 | 1 | RhoGDI alpha         | 0,0626   | 0,137987 | 1 | RhoGDI alpha         |
| 35 | Beta-catenin-dependent transcription regulation in colorectal cancer                                     | 36 | 0,064333 | 0,136222 | 0,069733 | 0,136222 | 1 | Calcyclin            | 0,064333 | 0,137987 | 1 | Calcyclin            |
| 36 | Immune response_IL-6-induced acute-phase response in hepatocytes                                         | 36 | 0,064333 | 0,136222 | 0,069733 | 0,136222 | 1 | HP                   | 0,064333 | 0,137987 | 1 | HP                   |
| 37 | G-protein signaling_Rac2 regulation pathway                                                              | 36 | 0,064333 | 0,136222 | 0,069733 | 0,136222 | 1 | RhoGDI alpha         | 0,064333 | 0,137987 | 1 | RhoGDI alpha         |
| 38 | Influence of low doses of Arsenite on Glucose stimulated Insulin secretion in pancreatic cells           | 36 | 0,064333 | 0,136222 | 0,069733 | 0,136222 | 1 | PRDX1                | 0,064333 | 0,137987 | 1 | PRDX1                |
| 39 | iNKT cell-keratinocyte interactions in allergic contact dermatitis                                       | 36 | 0,064333 | 0,136222 | 0,069733 | 0,136222 | 1 | Beta-2-microglobulin | 0,064333 | 0,137987 | 1 | Beta-2-microglobulin |
| 40 | Atorvastatin in treatment of type 2 diabetes and metabolic syndrome X                                    | 39 | 0,069511 | 0,137987 | 0,075328 | 0,142535 | 1 | APOA1                | 0,069511 | 0,137987 | 1 | APOA1                |
| 41 | Development_TGF-beta family mediated differentiation of embryonic stem cells                             | 42 | 0,074662 | 0,137987 | 0,080891 | 0,142535 | 1 | Transthyretin        | 0,074662 | 0,137987 | 1 | Transthyretin        |
| 42 | Immune response_Antimicrobial actions of IFN-gamma                                                       | 43 | 0,076373 | 0,137987 | 0,082739 | 0,142535 | 1 | Factor B             | 0,076373 | 0,137987 | 1 | Factor B             |
| 43 | Cytoskeleton remodeling_Hyaluronic acid/ CD44 signaling pathways                                         | 43 | 0,076373 | 0,137987 | 0,082739 | 0,142535 | 1 | RhoGDI alpha         | 0,076373 | 0,137987 | 1 | RhoGDI alpha         |
| 44 | Role of TNF-alpha, IL-1beta and IL-6 in development of obesity and type 2 diabetes in liver              | 45 | 0,079786 | 0,137987 | 0,086422 | 0,142535 | 1 | APOA1                | 0,079786 | 0,137987 | 1 | APOA1                |
| 45 | Immune response_Induction of the antigen presentation machinery by IFN-gamma                             | 53 | 0,093318 | 0,137987 | 0,101016 | 0,142535 | 1 | Beta-2-microglobulin | 0,093318 | 0,137987 | 1 | Beta-2-microglobulin |
| 46 | Role of IL-23/ T17 pathogenic axis in psoriasis                                                          | 53 | 0,093318 | 0,137987 | 0,101016 | 0,142535 | 1 | Calgranulin B        | 0,093318 | 0,137987 | 1 | Calgranulin B        |
| 47 | Oxidative stress_Role of ASK1 under oxidative stress                                                     | 54 | 0,094995 | 0,137987 | 0,102824 | 0,142535 | 1 | PRDX1                | 0,094995 | 0,137987 | 1 | PRDX1                |
| 48 | Immune response_Antigen presentation by MHC class I, classical pathway                                   | 54 | 0,094995 | 0,137987 | 0,102824 | 0,142535 | 1 | Beta-2-microglobulin | 0,094995 | 0,137987 | 1 | Beta-2-microglobulin |

|    |                                                                                                |    |          |          |          |          |   |               |          |          |   |               |
|----|------------------------------------------------------------------------------------------------|----|----------|----------|----------|----------|---|---------------|----------|----------|---|---------------|
| 49 | NRF2 regulation of oxidative stress response                                                   | 54 | 0,094995 | 0,137987 | 0,102824 | 0,142535 | 1 | PRDX1         | 0,094995 | 0,137987 | 1 | PRDX1         |
| 50 | Role of Thyroid hormone in regulation of oligodendrocyte differentiation in multiple sclerosis | 55 | 0,09667  | 0,137987 | 0,104629 | 0,142535 | 1 | Transthyretin | 0,09667  | 0,137987 | 1 | Transthyretin |

**Table S3.** MetaCore Analysis: the comparison of Pathway Maps by gene ontology of the up-regulated protein in LC-IPF (black) and up-regulated proteins in IPF (grey).
